# Supplementary material
Source: MDPI journal article supplement (https://www.mdpi.com/2073-4352/14/4/357)
Supplement: s1 [file s1]

Archive with 4 entries (4 files):
- crystals-2948281-supplementary-English-editing.pdf
- Supplementary Movie 1.avi
- Supplementary Movie 2.avi
- Supplementary Movie 3.avi
